# Supplementary material for: Strong magnetic field-dual-assisted fabrication of heterogeneous sulfide-based hollow nanochain electrodes for high-rate supercapacitors
Source: Royal Society of Chemistry journal article supplement (doi:10.1039/c9ta07224a), 2019-01-01
Supplement: c9ta07224a1.pdf [file c9ta07224a1.pdf]

## Supplementary Information

### **Strong magnetic field-dual-assisted fabrication of heterogeneous sulfides hollow nanochains electrodes for high-rate supercapacitors**

Xing Yu,<sup>a</sup> Jiali Yu,<sup>a</sup> Yves Fautrelle,<sup>b</sup> Annie Gagnoud,<sup>b</sup> Zhongming Ren,<sup>a</sup> Xionggang Lu,<sup>a</sup> and Xi Li<sup>\*ab</sup>

*<sup>a</sup>State Key Laboratory of Advanced Special Steels, School of Materials Science and Engineering, Shanghai University, Shanghai 200072, P. R. China. E-mail: lx\_net@sina.com*

*<sup>b</sup>SIMAP-EPM-Madylam/G-INP/CNRS, ENSHMG, BP 38402 St Martin d'Herès Cedex, France*

## Experimental

*Synthesis of Co-based glycolate precursors:* Typically, 0.4 g polyvinyl pyrrolidone (PVP,  $M_w \sim 58,000$ ) was dissolved in ethylene glycol (EG). 0.5 g  $\text{Co}(\text{CH}_3\text{COO})_2 \cdot 4\text{H}_2\text{O}$  and 55 mg  $\text{Zn}(\text{CH}_3\text{COO})_2 \cdot 2\text{H}_2\text{O}$  were then added into the above transparent solution. Afterward, the obtained mixed solution was transferred into a round bottom flask and refluxed at 170 °C for 2 h in an oil bath. After the solution was cooled down naturally, a purple precipitate, namely CZ<sub>55</sub>-glycolate, was collected by centrifugation. For comparison, different Co-based glycolate precursors were prepared through the same process and marked as C-glycolate, CZ<sub>35</sub>-glycolate and CM<sub>51</sub>-glycolate, respectively, by altering the amount of  $\text{Zn}(\text{CH}_3\text{COO})_2 \cdot 2\text{H}_2\text{O}$  such as 0 and 35 mg, and substituting  $\text{Zn}(\text{CH}_3\text{COO})_2 \cdot 2\text{H}_2\text{O}$  with other acetates such as  $\text{Mn}(\text{CH}_3\text{COO})_2 \cdot 4\text{H}_2\text{O}$ .

*Synthesis of the hollow CZ<sub>55</sub>S<sup>6T</sup> nanochains:* First, 30 mg CZ<sub>55</sub>-glycolate was dispersed into pure ethanol by ultrasonic. After that, 60 mg thioacetamide (TAA) was added to the suspension under vigorous stirring. Then, the mixture was put into a Teflon-lined autoclave, which was subsequently placed in a superconducting magnet (OXFORD) with a field strength of 6T, and maintained at 160 °C for 2 h. After centrifugation and wash with ethanol for three times, the black powder of CZ<sub>55</sub>S<sup>6T</sup> HNCs was obtained by drying in vacuum. For comparison, different field strengths such as 0T, 1T, 2T and 3T, and different precursors like C-glycolate, CZ<sub>35</sub>-glycolate and CM<sub>51</sub>-glycolate were applied alone, and the corresponding samples were denoted as CZ<sub>55</sub>S<sup>0T</sup>, CZ<sub>55</sub>S<sup>1T</sup>, CZ<sub>55</sub>S<sup>2T</sup>, CZ<sub>55</sub>S<sup>3T</sup> and CS<sup>6T</sup>, CZ<sub>35</sub>S<sup>6T</sup>, CM<sub>51</sub>S<sup>6T</sup>.

*Materials characterization:* The samples were characterized using X-ray diffraction (XRD, Rigaku D/max, Cu K $\alpha$  radiation,  $\lambda = 0.154178$  nm), field-emission scanning electron microscopy (FESEM, JSM-6700F, 10 kV), transmission electron microscopy (TEM, JEOL JEM-200CX, 160 kV), high-resolution TEM (HRTEM, JEOL JEM-2100F, 200 kV) equipped with Energy-dispersive X-ray spectroscopy (EDX). The Brunauer–Emmett–Teller (BET) surface area was measured by N<sub>2</sub> adsorption/desorption (Autosorb IQ2 analyzer). The surface elemental composition was determined by X-ray photoelectron spectroscopy (XPS, ESCALab 250 xi). Magnetic measurements were performed on a commercial Superconducting Quantum Interference Device (SQUID, Quantum Design) magnetometer.

*Electrochemical Measurements:* Electrochemical measurements were performed on a CHI 760E electrochemical workstation (CH instrument Inc., China) and a LAND battery program-control test system (LAND, Wuhan). The electrochemical performances were first evaluated in 6 M KOH electrolyte by a three-electrode system with a counter electrode (Pt foil) and a reference electrode (saturated calomel electrode, SCE). The working electrode was composed of 70 wt% active materials, 20 wt% multilayer graphene flakes (GF) with average thickness of 2.4 nm (Ningbo Morsh Technology Co., Ltd) and 10 wt% polymer binder (polyvinylidene fluoride, PVDF). For the preparation of oriented CZ<sub>55</sub>S<sup>6T</sup>/G electrode, the drop-cast and evaporation of electrode suspension under 12T SMF was applied. To prepare the suspension, PVDF was first dissolved into N-methyl-2-pyrrolidone (NMP), the CZ<sub>55</sub>S<sup>6T</sup> HNCs were dispersed in NMP by light ultrasonic, and the multilayer GF synthesized via

intercalation and exfoliation of graphite were also dispersed in NMP homogeneously with the help of strong ultrasonic. The former two solutions were first mixed together under vigorous stirring. Afterwards, the third suspension was added to the mixed solution to assist aligning the nanochains and increase both the conductivity and density of the electrode. The as-derived suspension was then cast into a cylindrical plastic mould on a nickel foil under 12T SMF. The NMP solvent was allowed to evaporate at 25 °C. For comparison, the CZ<sub>55</sub>S<sup>6T</sup> and CZ<sub>55</sub>S<sup>0T</sup> electrodes were fabricated in the same process without magnetic field. The mass loading of each electrode is around 8 mg cm<sup>-2</sup>. Cyclic voltammetry (CV), galvanostatic charge-discharge (GCD) and cycling GCD measurements were conducted at relatively high rates except the lower ones.

An asymmetric supercapacitor (ASC) device was assembled using the oriented CZ<sub>55</sub>S<sup>6T</sup>/G electrode as the positive electrode, the activated carbon (AC) as the negative electrode, and a glass fiber filter paper as the separator. A 6 M KOH solution were employed as the electrolyte. The mass ratio of positive electrode to negative electrode was determined based on the well-known charge balance equation ( $q_+ = q_-$ ). The mass loading of the AC and CZ<sub>55</sub>S<sup>6T</sup>/G in the negative and positive electrodes were around 5 and 8 mg cm<sup>-2</sup>, respectively.

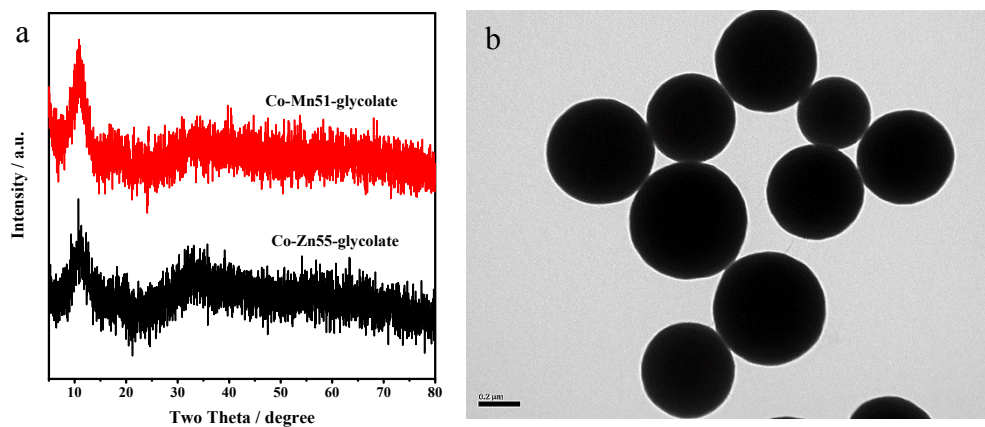

Fig. S1 (a) XRD patterns of the CZ<sub>55</sub>-glycolate and CM<sub>51</sub>-glycolate precursors. (b) TEM image of the solid CZ<sub>55</sub>-glycolate spheres.

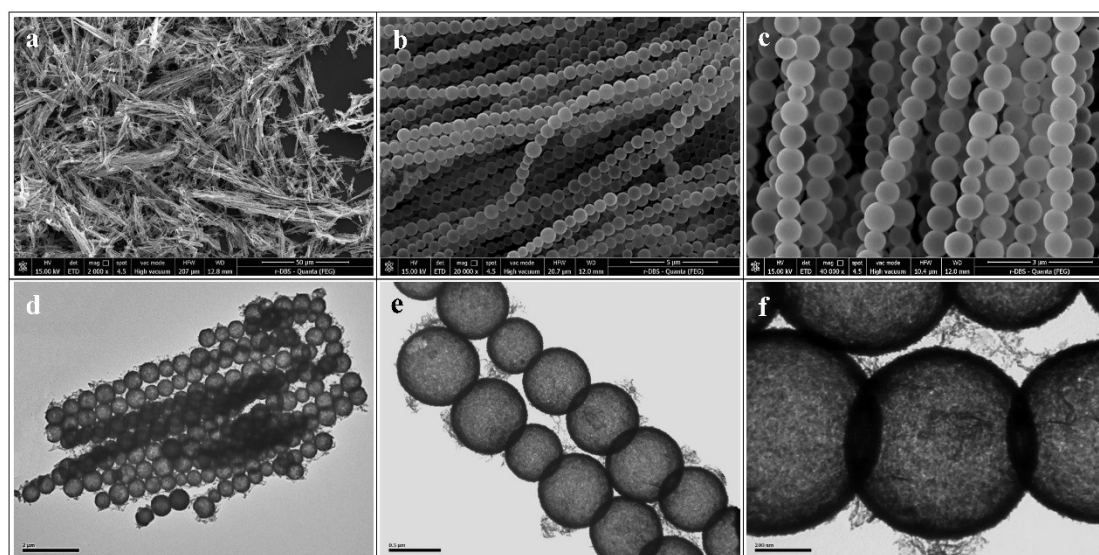

Fig. S2 (a–c) FESEM images and (d–f) TEM images of the CZ<sub>55</sub>S<sup>6T</sup> HNCs with different magnifications.

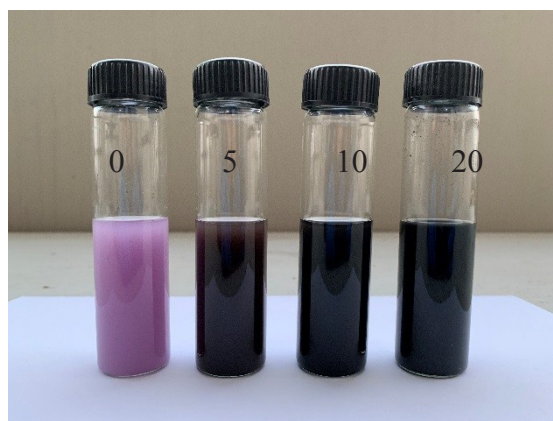

Fig. S3 Digital photo of the intermediates captured after sulfidation reaction for different periods (min) under a 6T SMF, showing the colour change of the intermediates.

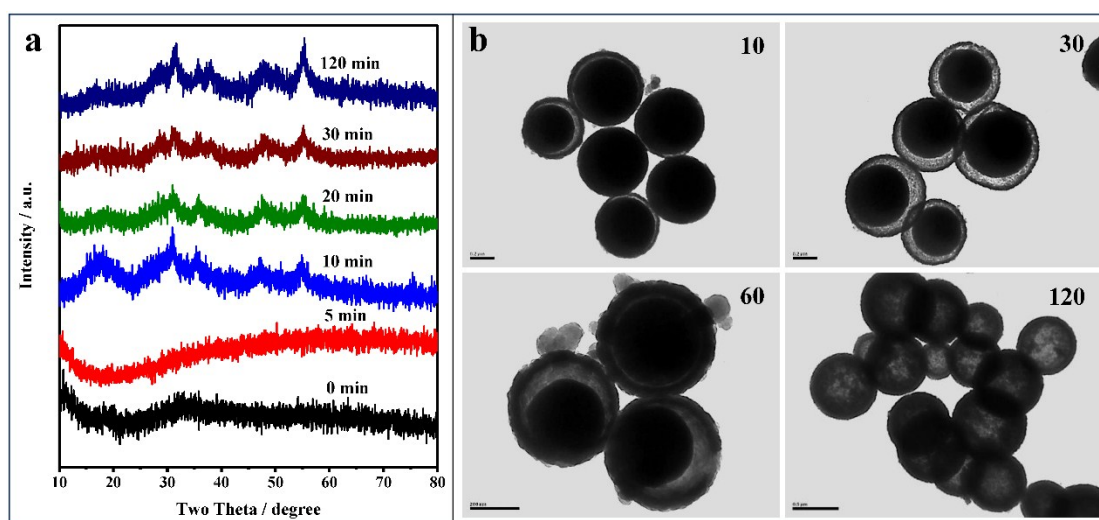

Fig. S4 (a) XRD patterns of the products after sulfidation of  $CZ_{55}$ -glycolate for different durations (min) under a 6T SMF. (b) TEM images of the intermediates captured after sulfidation reaction for different durations (min) without magnetic field.

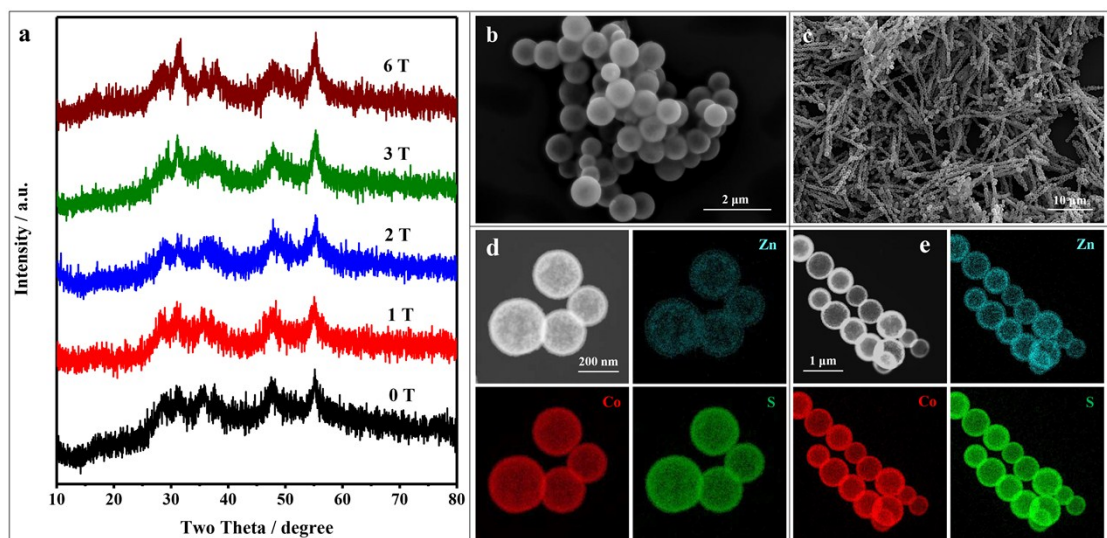

Fig. S5 (a) XRD patterns of products obtained after sulfidation of  $CZ_{55}$ -glycolate for 2 h under different magnetic fields. (b) A panoramic FESEM image of  $CZ_{55}S^{0T}$  obtained without magnetic field. (c) HAADF-STEM elemental mapping of the  $CZ_{55}S^{0T}$  hollow spheres. (d) A panoramic FESEM image of  $CZ_{55}S^{3T}$  obtained under a 3T magnetic field. (e) HAADF-STEM elemental mapping of the  $CZ_{55}S^{3T}$  HNCs.

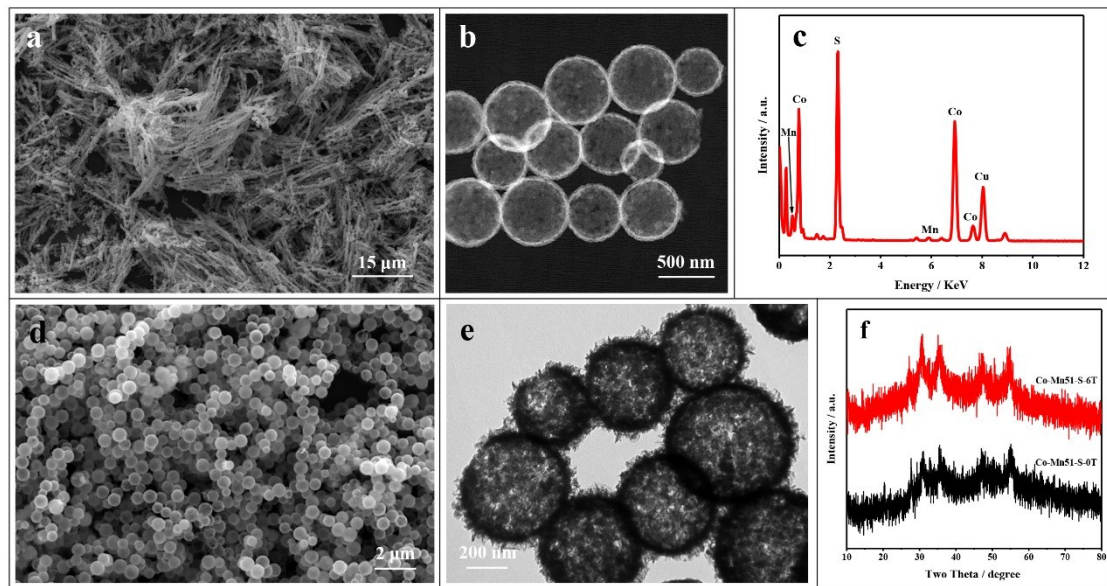

Fig. S6 (a) FESEM, (b) HAADF-STEM images and (c) EDS spectrum of the  $CM_{51}S^{6T}$  HNCs obtained after sulfidation of the  $CM_{51}$ -glycolate solid spheres for 2 h under a 6T SMF. (d) FESEM, (e) TEM images of the  $CM_{51}S^{0T}$  obtained after sulfidation of the  $CM_{51}$ -glycolate solid spheres for 2 h without magnetic field. (f) XRD patterns of the as-prepared  $CM_{51}S^{0T}$  and  $CM_{51}S^{6T}$ .

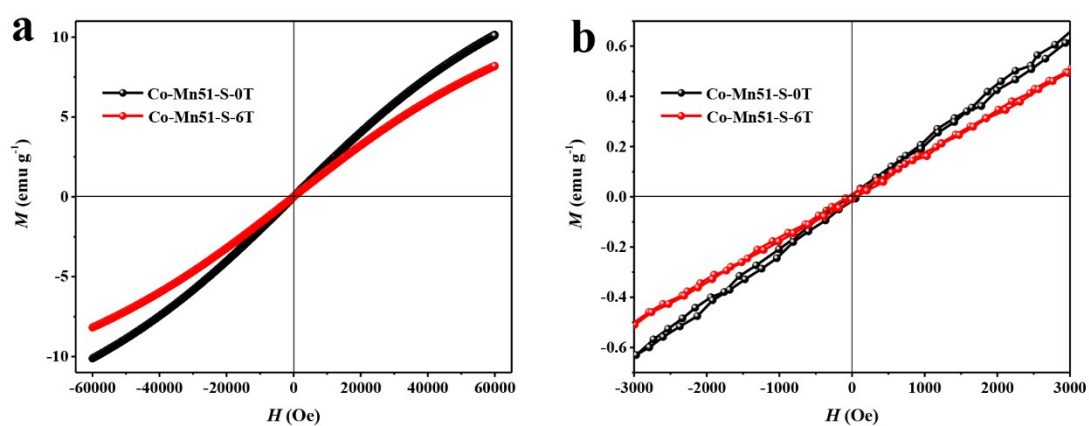

Fig. S7 (a)  $M-H$  curves and (b) the corresponding enlarged parts of  $\text{CM}_{51}\text{S}^{0\text{T}}$  and  $\text{CM}_{51}\text{S}^{6\text{T}}$  at 6 K.

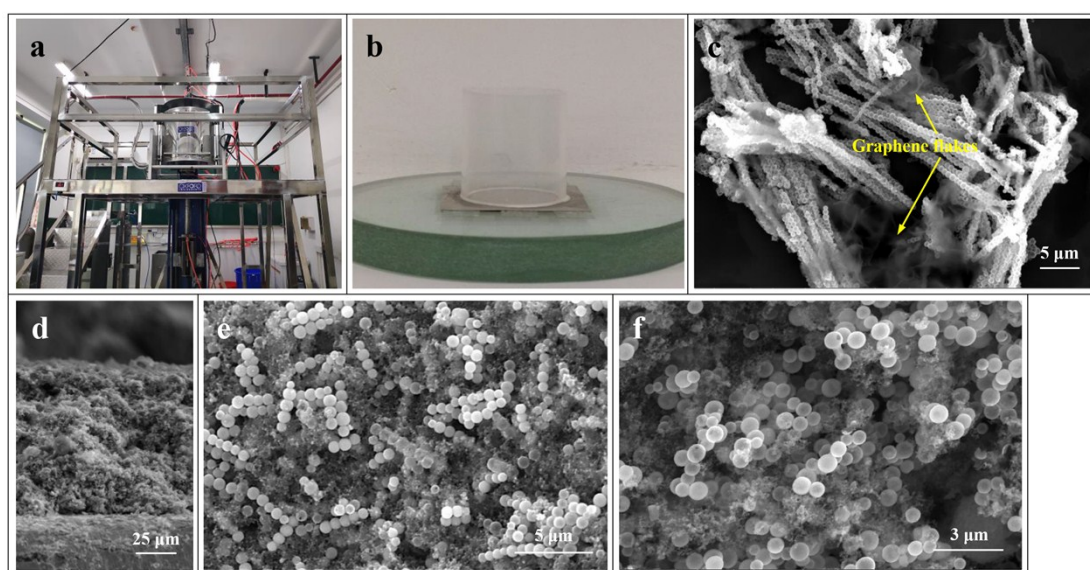

Fig. S8 Photo images of (a) magnetic field apparatus and (b) suspension casting mould. (c) SEM image of  $\text{CZ}_{55}\text{S}^{6\text{T}}/\text{G}$  electrode materials after ultrasonic. Cross-sectional SEM image of (d) aligned  $\text{CZ}_{55}\text{S}^{6\text{T}}/\text{G}$  electrode with low magnification, (e)  $\text{CZ}_{55}\text{S}^{6\text{T}}$  electrode and (f)  $\text{CZ}_{55}\text{S}^{0\text{T}}$  electrode.



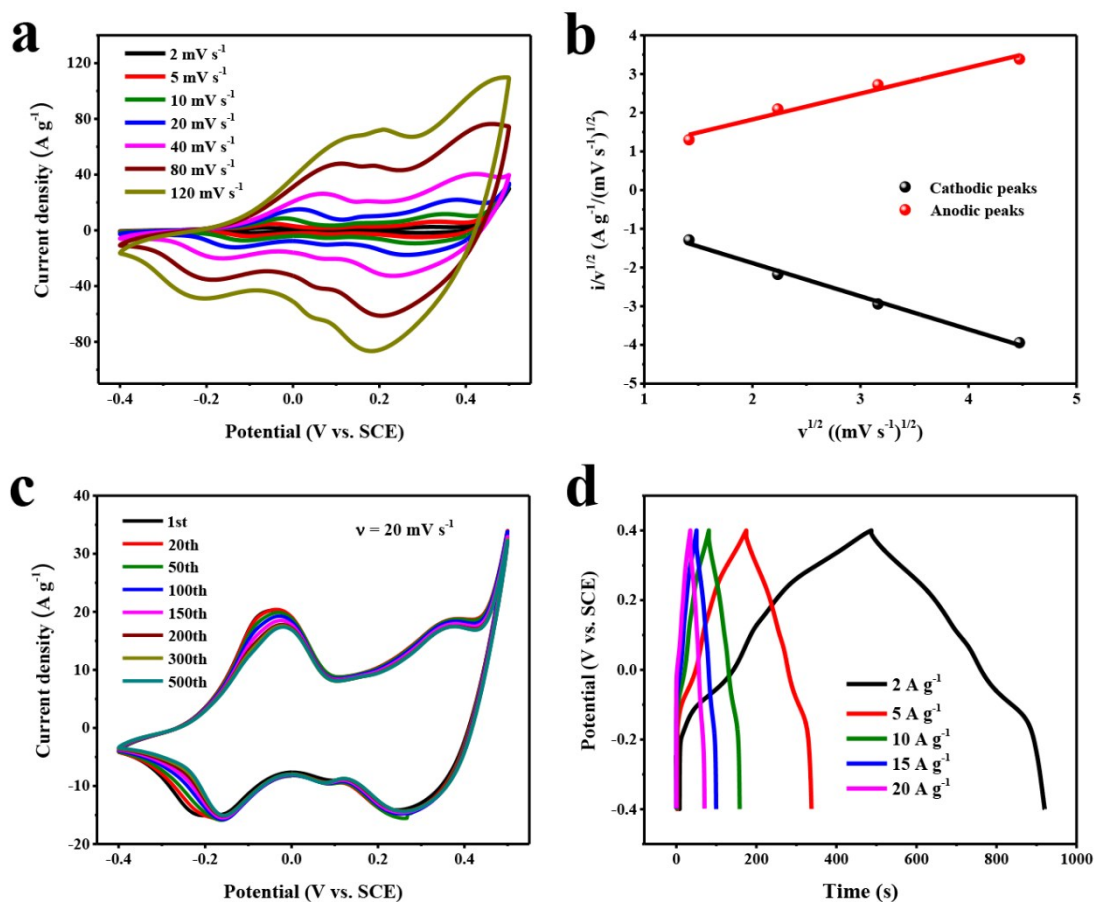

Fig. S9 Electrochemical evaluation of the aligned CZ<sub>55</sub>S<sup>6T</sup>/G electrode. (a) CV curves at different scan rates. (b) Dependence of the peak current density on square root of scan rate. (c) CV curves (20 mV s<sup>-1</sup>) with different cycles as indicated. (d) GCD curves at various current densities.

**Table S1.** The equations based on CV curves of the aligned CZ<sub>55</sub>S<sup>6T</sup>/G electrode for both anodic and cathodic peaks.

|          |                                                            |
|----------|------------------------------------------------------------|
| Peak     | $i/v^{1/2} = k_1v^{1/2} + k_2$ ( $i = k_1v + k_2v^{1/2}$ ) |
| Anodic   | $i/v^{1/2} = 0.67504v^{1/2} + 0.48281$                     |
| Cathodic | $i/v^{1/2} = -0.85673v^{1/2} - 0.1712$                     |

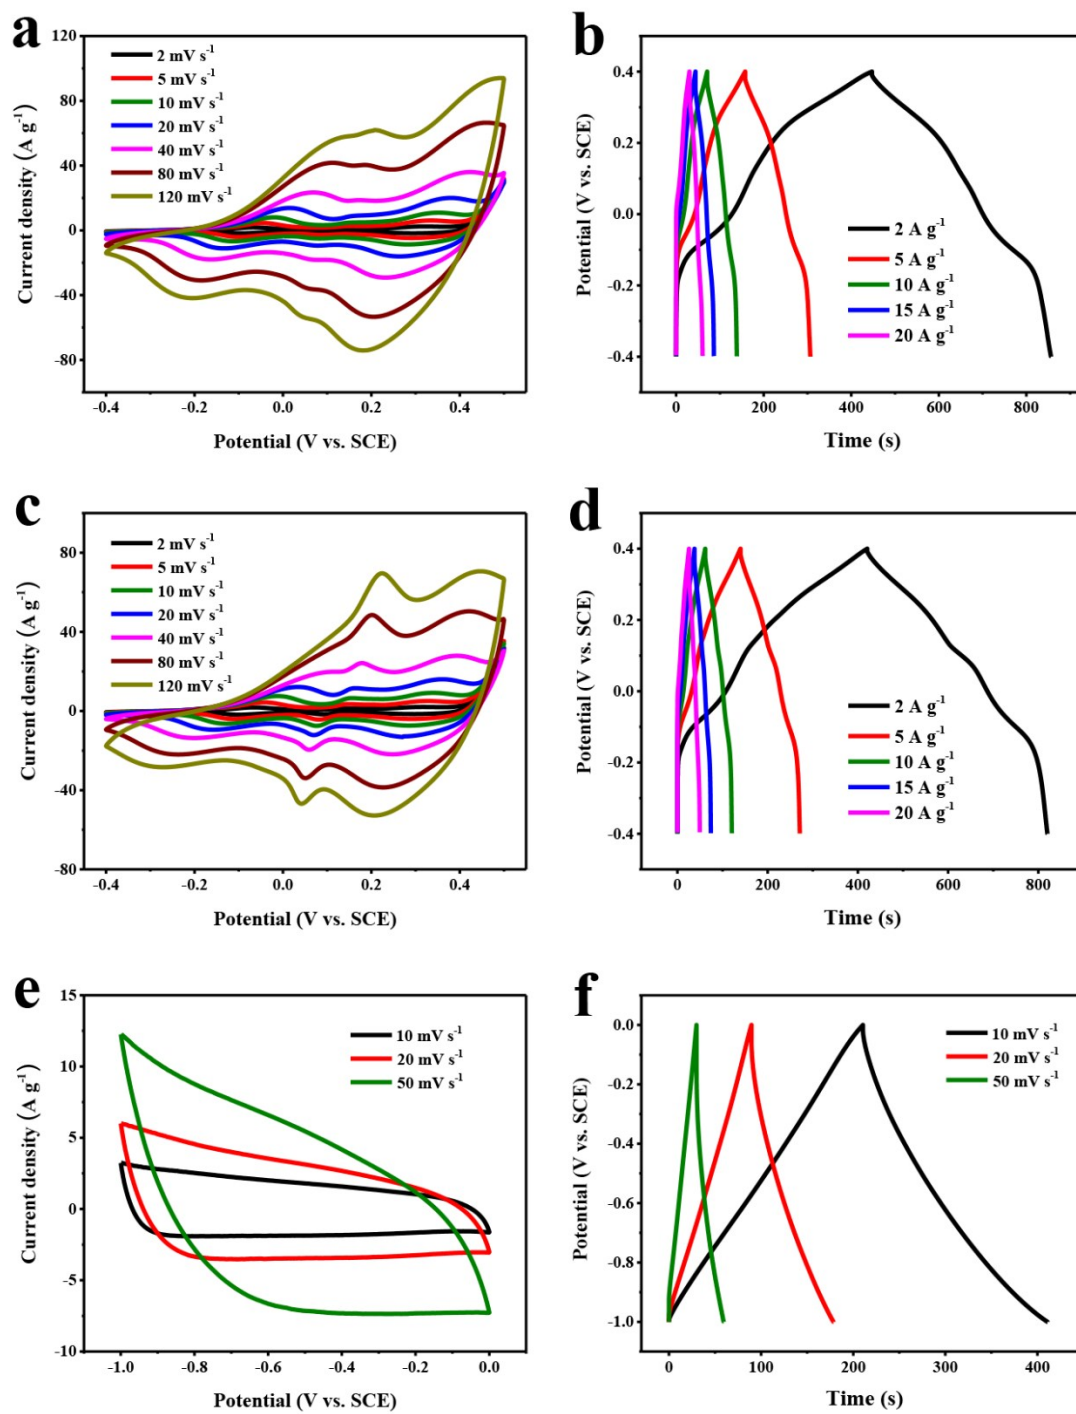

Fig. S10 (a, c, e) CV curves at different scan rates and (b, d, f) GCD curves at various current densities of the (a, b) CZ<sub>55</sub>S<sup>6T</sup>, (c, d) CZ<sub>55</sub>S<sup>0T</sup> and (e, f) activated carbon (AC) electrodes.

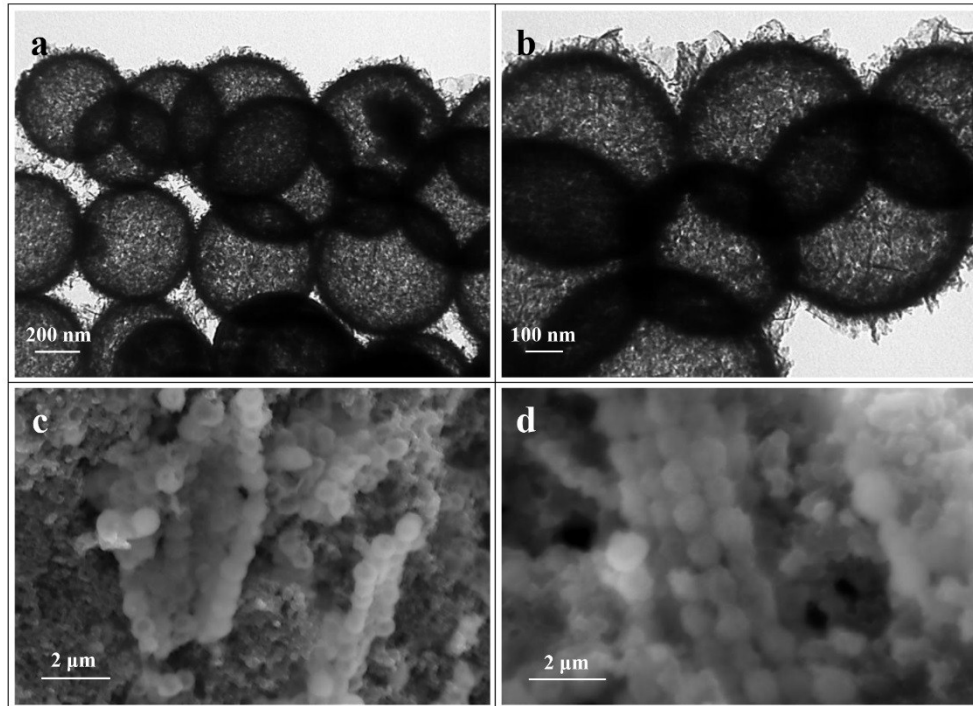

Fig. S11 (a, b) TEM images of the  $\text{CZ}_{55}\text{S}^{6\text{T}}$  HNCs after repeated charge/discharge tests. (c, d) Cross-sectional SEM images of the  $\text{CZ}_{55}\text{S}^{6\text{T}}/\text{G}$  electrodes after repeated charge/discharge tests.

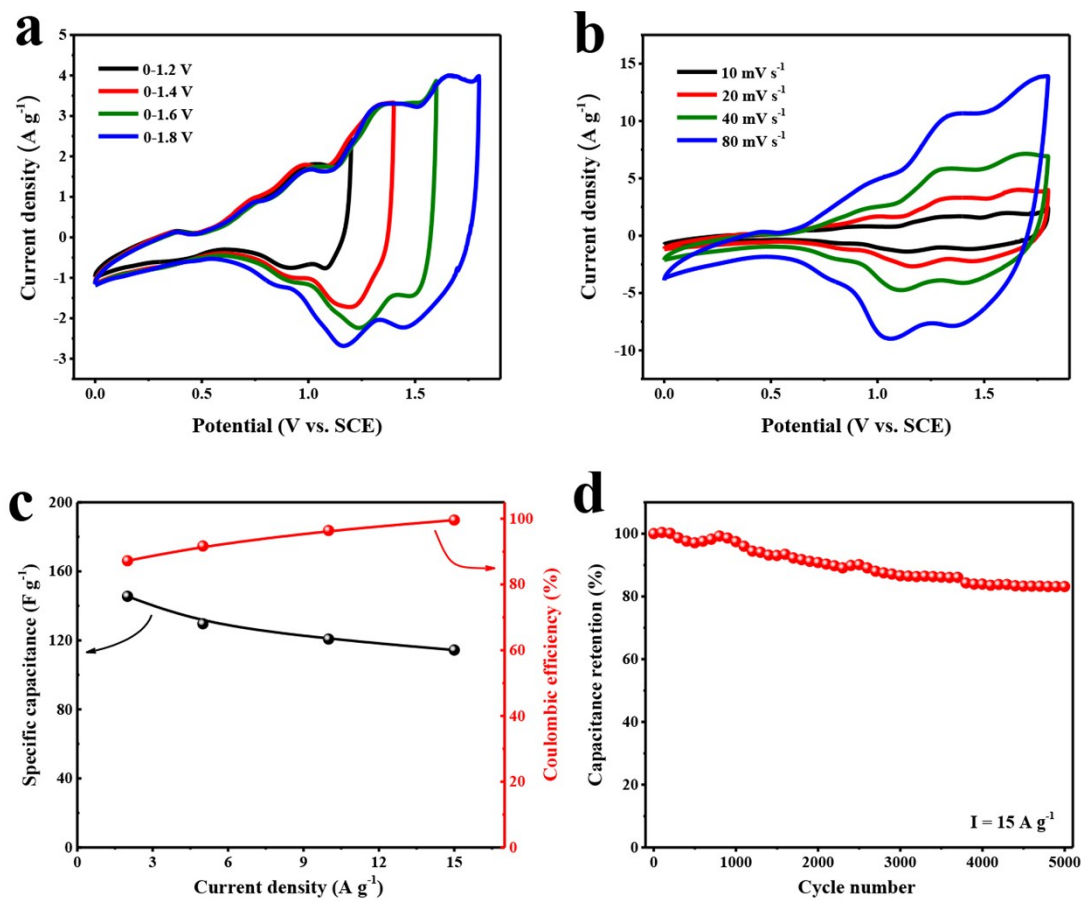

Fig. S12 Electrochemical evaluation of the CZ<sub>55</sub>S<sub>6</sub>T/G//AC ASC. (a) CV curves under various potential windows at 20 mV s<sup>-1</sup>. (b) CV curves at different scan rates. (c) Specific capacitance and coulombic efficiency as a function of current density. (d) Cycling performance at a constant current density of 15 A g<sup>-1</sup>.
